# Supplementary material for: High-efficiency photo- and electro-catalytic material based on a basket-like {Sr⊂P6Mo18O73} cage
Source: Royal Society of Chemistry journal article supplement (doi:10.1039/c5ra09573e), 2015-01-01
Supplement: c5ra09573e1.pdf [file c5ra09573e1.pdf]

## Support Information

### High-Efficient Photo- and Electro-catalytic Materials Based on Basket-like {Sr<sub>2</sub>P<sub>6</sub>Mo<sub>18</sub>O<sub>73</sub>} Cage

Kai Yu<sup>a,b</sup>, He Zhang<sup>a,b</sup>, Jing-hua Lv<sup>a\*</sup>, Li-hong Gong<sup>a,b</sup>, Chun-mei Wang<sup>a,b</sup>, Lu Wang<sup>c</sup>, Chun-xiao Wang<sup>a,b</sup>, Bai-Bin Zhou<sup>a,b\*</sup>

#### 1. Structural figures

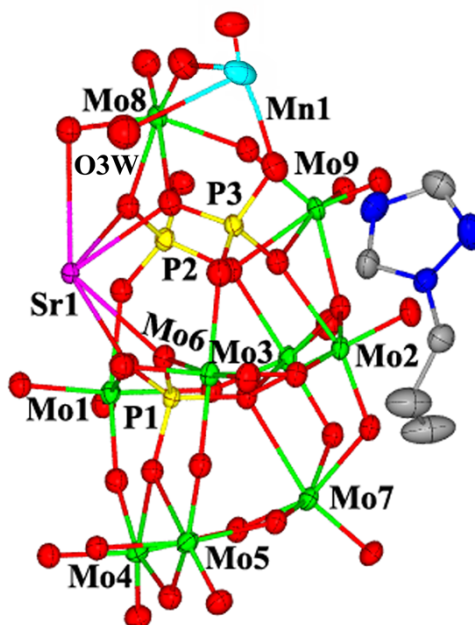

**Figure S1** ORTEP view of the basic units in compound 1 with 50% thermal ellipsoid.

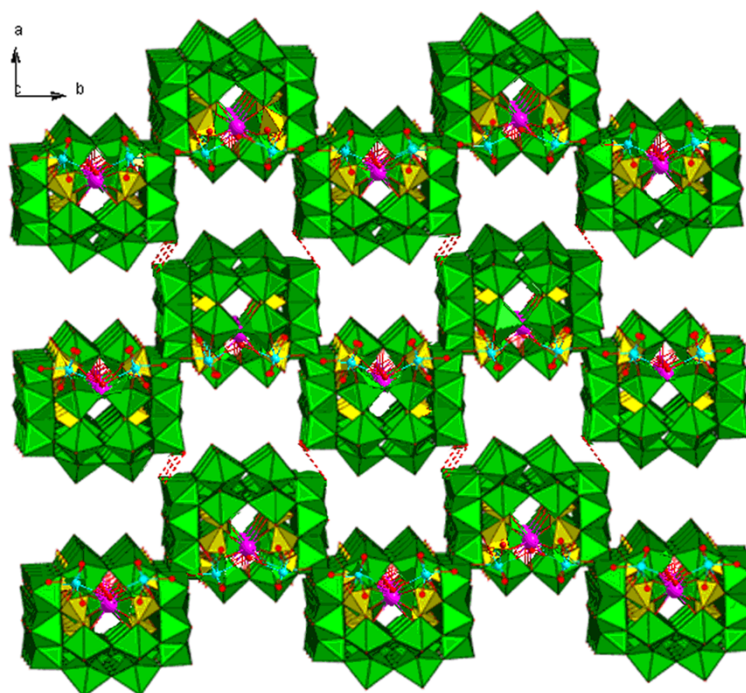

**Figure S2** The 3-D supramolecular network on the ab plane of compound 1.

## 2. Structural data

**Table S1** Selected bond lengths (Å) and bond angles (°) of compound **1**

|                      |           |                       |            |                     |            |
|----------------------|-----------|-----------------------|------------|---------------------|------------|
| Mo(1)-O(34)          | 1.678(8)  | Mo(1)-O(2)            | 1.8707(13) | Mo(1)-O(26)         | 2.025(7)   |
| Mo(1)-O(16)          | 1.862(8)  | Mo(1)-O(6)            | 2.224(7)   | Mo(1)-O(17)         | 2.061(7)   |
| Mo(2)-O(28)          | 1.691(8)  | Mo(2)-O(18)           | 1.778(8)   | Mo(2)-O(14)         | 1.800(8)   |
| Mo(2)-O(5)           | 2.049(8)  | Mo(2)-O(20)           | 2.141(7)   | Mo(2)-O(23)         | 2.459(7)   |
| Mo(3)-O(38)          | 1.676(8)  | Mo(3)-O(26)           | 1.787(7)   | Mo(3)-O(9)          | 1.805(7)   |
| Mo(3)-O(5)           | 2.064(8)  | Mo(3)-O(24)           | 2.150(7)   | Mo(3)-O(23)         | 2.361(7)   |
| Mo(4)-O(35)          | 1.677(8)  | Mo(4)-O(13)           | 1.8751(11) | Mo(4)-O(16)         | 1.898(8)   |
| Mo(4)-O(15)          | 1.985(8)  | Mo(4)-O(21)           | 2.069(7)   | Mo(4)-O(11)         | 2.298(7)   |
| Mo(5)-O(36)          | 1.682(8)  | Mo(5)-O(7)            | 1.877(8)   | Mo(5)-O(8)          | 1.8801(12) |
| Mo(5)-O(15)          | 1.981(8)  | Mo(5)-O(12)           | 2.057(7)   | Mo(5)-O(11)         | 2.291(7)   |
| Mo(6)-O(31)          | 1.679(8)  | Mo(6)-O(1)            | 1.8617(13) | Mo(6)-O(7)          | 1.877(8)   |
| Mo(6)-O(18)          | 2.031(7)  | Mo(6)-O(19)           | 2.049(8)   | Mo(6)-O(4)          | 2.238(7)   |
| Mo(7)-O(29)          | 1.695(7)  | Mo(7)-O(21)           | 1.803(8)   | Mo(7)-O(12)         | 1.805(7)   |
| Mo(7)-O(9)           | 2.059(8)  | Mo(7)-O(14)           | 2.086(8)   | Mo(7)-O(23)         | 2.408(7)   |
| Mo(8)-O(32)          | 1.697(9)  | Mo(8)-O(40)           | 1.696(10)  | Mo(8)-O(3)          | 1.8913(19) |
| Mo(8)-O(33)          | 1.985(8)  | Mo(8)-O(22)           | 2.243(8)   | Mo(8)-O(27)         | 2.279(8)   |
| Mo(9)-O(37)          | 1.709(8)  | Mo(9)-O(30)           | 1.717(8)   | Mo(9)-O(33)         | 1.831(8)   |
| Mo(9)-O(5)           | 2.037(7)  | Mo(9)-O(20)           | 2.296(7)   | Mo(9)-O(24)         | 2.322(7)   |
| P(1)-O(6)            | 1.517(8)  | P(1)-O(11)            | 1.536(8)   | P(2)-O(17)          | 1.516(8)   |
| P(1)-O(4)            | 1.523(8)  | P(1)-O(23)            | 1.573(7)   | P(2)-O(22)          | 1.523(8)   |
| P(2)-O(24)           | 1.553(8)  | P(3)-O(27)            | 1.510(8)   | P(3)-O(19)          | 1.536(9)   |
| P(2)-O(10)           | 1.569(8)  | P(3)-O(25)            | 1.536(9)   | P(3)-O(20)          | 1.572(8)   |
| Sr(1)-O(27)#1        | 2.557(8)  | Sr(1)-O(22)#1         | 2.594(7)   | Sr(1)-O(4)          | 2.653(7)   |
| Sr(1)-O(27)          | 2.557(8)  | Sr(1)-O(22)           | 2.594(7)   | Sr(1)-O(4)#1        | 2.653(7)   |
| Sr(1)-O(6)           | 2.664(7)  | Sr(1)-O(6)#1          | 2.664(7)   | Sr(1)-O(3)          | 2.864(11)  |
| Mn(1)-O(39)          | 1.823(16) | Mn(1)-O(25)           | 2.045(10)  | Mn(1)-O(30)#2       | 2.328(9)   |
| Mn(1)-O(40)          | 2.379(11) | Mn(1)-O(34)#3         | 2.488(9)   |                     |            |
| O(34)-Mo(1)-O(16)    | 101.4(4)  | O(28)-Mo(2)-O(18)     | 104.0(4)   | O(38)-Mo(3)-O(26)   | 104.2(4)   |
| O(34)-Mo(1)-O(2)     | 99.5(4)   | O(28)-Mo(2)-O(14)     | 103.3(4)   | O(38)-Mo(3)-O(9)    | 103.0(4)   |
| O(34)-Mo(1)-O(26)    | 93.1(3)   | O(28)-Mo(2)-O(5)      | 99.6(4)    | O(38)-Mo(3)-O(5)    | 96.3(4)    |
| O(34)-Mo(1)-O(17)    | 95.1(3)   | O(28)-Mo(2)-O(20)     | 97.9(3)    | O(38)-Mo(3)-O(24)   | 95.4(3)    |
| O(34)-Mo(1)-O(6)     | 172.0(3)  | O(28)-Mo(2)-O(23)     | 170.5(3)   | O(38)-Mo(3)-O(23)   | 169.5(3)   |
| O(35)-Mo(4)-O(13)    | 101.1(4)  | O(36)-Mo(5)-O(7)      | 101.8(4)   | O(31)-Mo(6)-O(1)    | 98.7(4)    |
| O(35)-Mo(4)-O(16)    | 101.0(4)  | O(36)-Mo(5)-O(8)      | 99.5(4)    | O(31)-Mo(6)-O(7)    | 101.4(4)   |
| O(35)-Mo(4)-O(15)    | 100.0(4)  | O(36)-Mo(5)-O(15)     | 98.9(4)    | O(31)-Mo(6)-O(18)   | 94.6(3)    |
| O(35)-Mo(4)-O(21)    | 94.7(3)   | O(36)-Mo(5)-O(12)     | 95.4(3)    | O(31)-Mo(6)-O(19)   | 95.3(4)    |
| O(35)-Mo(4)-O(11)    | 170.3(3)  | O(36)-Mo(5)-O(11)     | 170.0(3)   | O(31)-Mo(6)-O(4)    | 173.3(4)   |
| O(29)-Mo(7)-O(21)    | 105.6(4)  | O(32)-Mo(8)-O(40)     | 101.9(5)   | O(37)-Mo(9)-O(30)   | 102.5(4)   |
| O(29)-Mo(7)-O(12)    | 105.8(4)  | O(32)-Mo(8)-O(3)      | 100.3(5)   | O(37)-Mo(9)-O(33)   | 104.9(4)   |
| O(29)-Mo(7)-O(9)     | 94.8(4)   | O(32)-Mo(8)-O(33)     | 97.2(4)    | O(37)-Mo(9)-O(5)    | 98.2(4)    |
| O(29)-Mo(7)-O(14)    | 94.9(3)   | O(32)-Mo(8)-O(22)     | 93.4(4)    | O(37)-Mo(9)-O(20)   | 85.7(3)    |
| O(29)-Mo(7)-O(23)    | 161.7(3)  | O(33)-Mo(8)-O(22)     | 80.3(3)    | O(37)-Mo(9)-O(24)   | 165.4(3)   |
| O(6)-P(1)-O(4)       | 107.5(4)  | O(6)-P(1)-O(11)       | 111.2(4)   | O(6)-P(1)-O(23)     | 109.5(4)   |
| O(17)-P(2)-O(22)     | 111.9(4)  | O(17)-P(2)-O(24)      | 112.2(4)   | O(17)-P(2)-O(10)    | 107.6(4)   |
| O(27)-P(3)-O(25)     | 112.1(5)  | O(27)-P(3)-O(19)      | 111.3(4)   | O(27)-P(3)-O(20)    | 107.7(4)   |
| O(27)#1-Sr(1)-O(27)  | 81.9(4)   | O(27)#1-Sr(1)-O(22)#1 | 65.7(2)    | O(27)#1-Sr(1)-O(22) | 115.3(2)   |
| O(27)#1-Sr(1)-O(4)   | 118.9(2)  | O(27)#1-Sr(1)-O(4)#1  | 73.1(2)    | O(27)#1-Sr(1)-O(6)  | 170.0(2)   |
| O(27)#1-Sr(1)-O(6)#1 | 102.3(2)  | O(27)#1-Sr(1)-O(3)    | 58.5(2)    | O(39)-Mn(1)-O(25)   | 171.5(6)   |
| O(39)-Mn(1)-O(30)#2  | 89.3(6)   | O(39)-Mn(1)-O(40)     | 94.9(6)    | O(39)-Mn(1)-O(34)#3 | 89.8(6)    |

Symmetry transformations used to generate equivalent atoms: #1 -x,-y,-z; #2 -x+1/2,-y+1/2,-z

**Table S2** Selected Hydrogen Bond Lengths ( ) and Bond Angles (°) of complexes **1**

| D-H...A         | d(D-H) | d(H...A) | <D-H...A | d(D...A)  | Symmetry                |
|-----------------|--------|----------|----------|-----------|-------------------------|
| N2-H2...O25     | 0.86   | 2.01     | 161.2    | 2.840(14) |                         |
| O1W-H1WB...O3W  | 0.85   | 1.90     | 105.4    | 2.28(2)   |                         |
| O39-H39A...O40  | 0.85   | 2.94     | 93.8     | 3.117(19) |                         |
| O1W-H1WA... O16 | 0.85   | 2.94     | 123.2    | 3.441(14) | [ x, y, z+1 ]           |
| O1W-H1WB... O34 | 0.85   | 2.41     | 154.8    | 3.205(13) | [ x, -y+3/2, z+1 ]      |
| O39-H39B...O34  | 0.85   | 2.91     | 93.7     | 3.080(18) | [ x, y, z+1 ]           |
| O39-H39B...O37  | 0.85   | 2.81     | 122.1    | 3.339(18) | [ -x+1/2, -y+1, z+1/2 ] |
| O3W-H3WB...O34  | 0.85   | 2.63     | 120.7    | 3.147(13) | [ x, -y+3/2, z+1 ]      |

### 3. Physical characterization

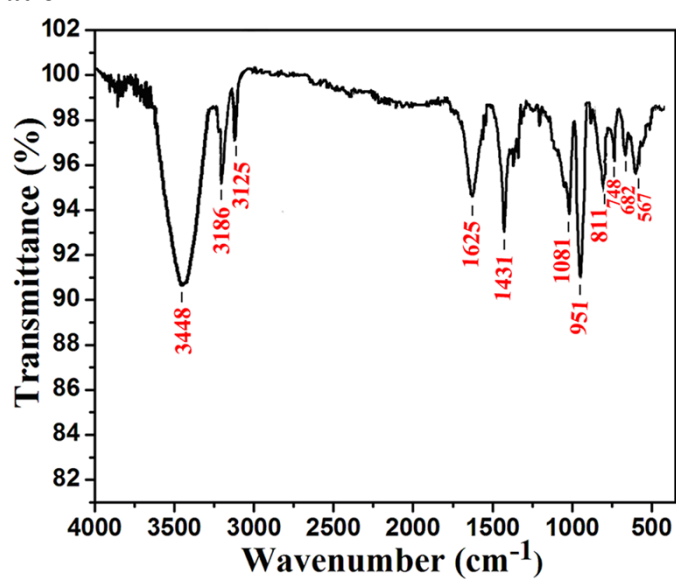**Fig. S3** IR spectra of compound **1**.

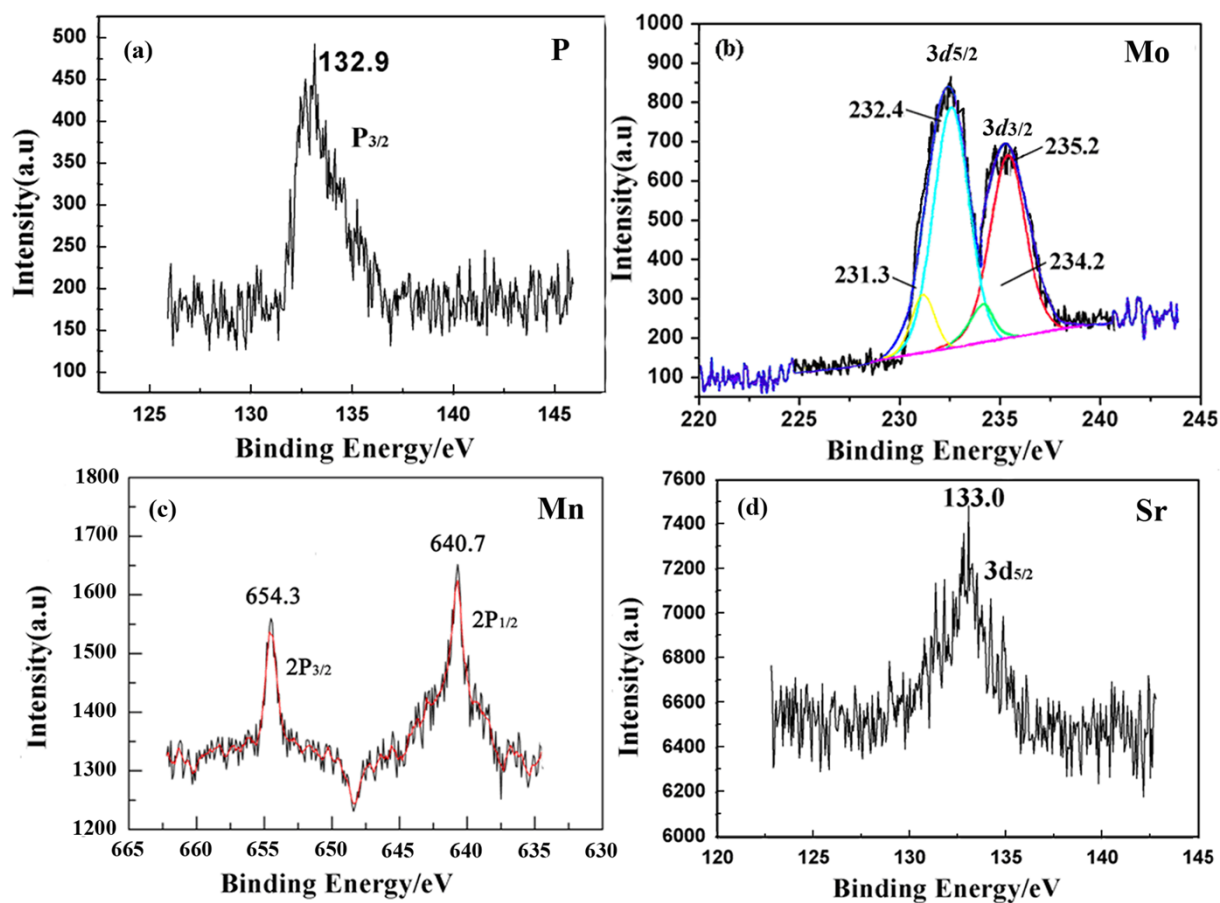

Fig. S4 The XPS spectrum of compound 1 for (a) P, (b) Mo, (c) Mn, and (d) Sr

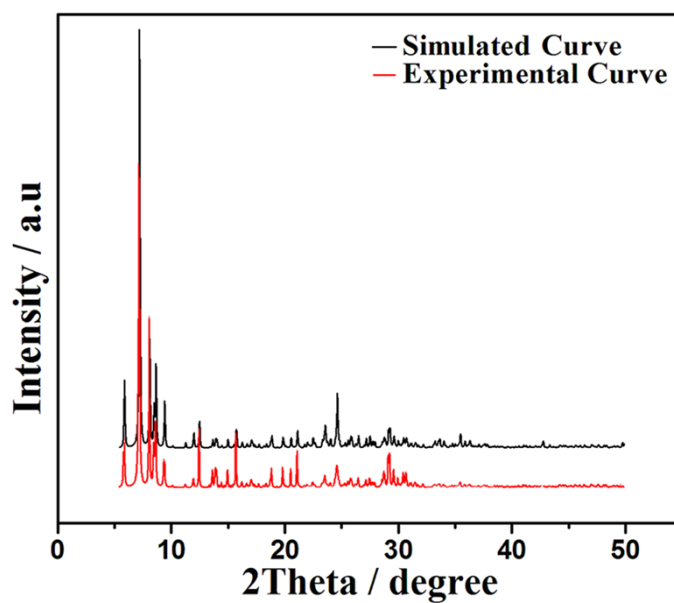

Fig. S5 The PXRD contrast curves of compound 1

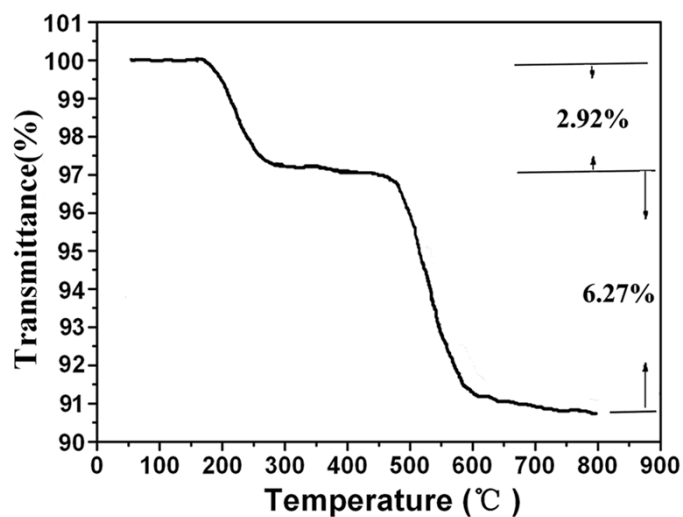

**Fig. S6** TG curve of compound 1

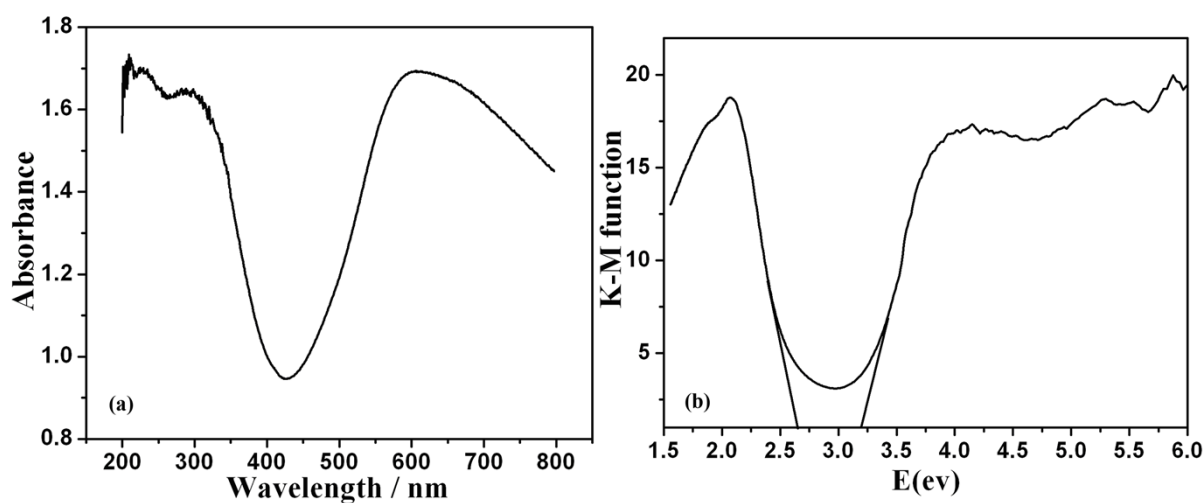

**Fig. S7** (a) Solid state UV-vis spectra of catalyst 1; (b) Kubelka-Munk- transformed diffuse reflectance spectra of catalyst 1.

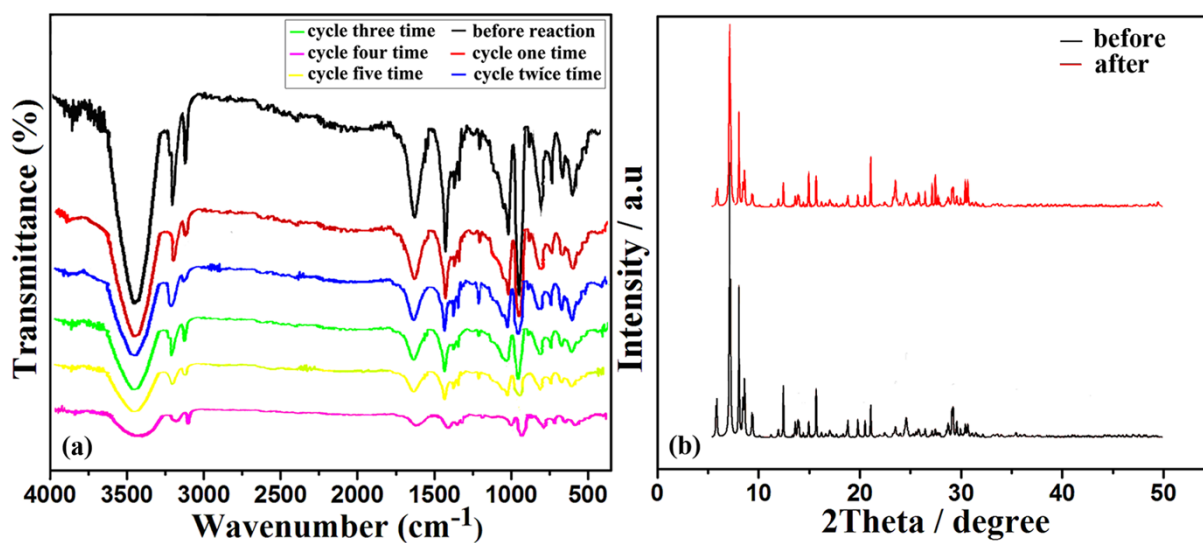

**Fig. S8** (a) The IR spectra of catalyst 1 before and after cycle reaction. (b) The XRD patterns of catalyst 1 before and after cycle five time.

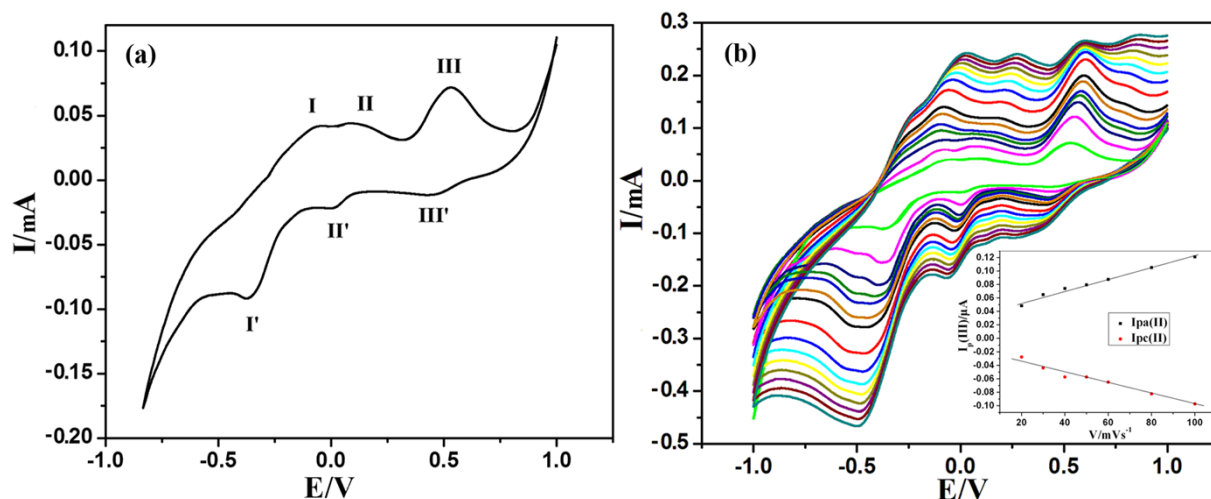

**Figure S9** Cyclic voltammograms of (a) **1-CPE** at  $20 \text{ mV s}^{-1}$  and (b) **1-CPE** at different scan rate (from inner to outer:  $20, 30, 40, 60, 80, 100, 120, 150, 200, 250, 300, 350, 400, 450, 500 \text{ mV s}^{-1}$ ). Potentials vs. SCE. (Insert plots: The dependence of anodic and cathodic peak II current on scan rates.); The CV of **1-CPE** show three reversible redox peaks in the potential range  $+1.0$  to  $-1.0 \text{ V}$ . The mean peak potentials [ $E_{1/2} = (E_{pa} + E_{pc})/2$ ] are  $+0.46, +0.06,$  and  $-0.23 \text{ V}$  (based on the CV at  $20 \text{ mV} \cdot \text{s}^{-1}$ ), which ascribed to three consecutive two-electron processes of basket  $[\text{Sr} \subset \text{P}_6\text{Mo}_{18}\text{O}_{73}]^{8-}$  heteropolymolybdate framework. The dependence of anodic and cathodic peak II current on scan rates. At scan rates lower than  $100 \text{ mV s}^{-1}$ , the peak currents were proportional to the scan rate, indicating that the redox process of the **1-CPE** are surface-controlled; while at scan rates higher than  $100 \text{ mV s}^{-1}$ , the peak currents were proportional to the square root of the scan rate, suggesting that redox process of the **1-CPE** is diffusion-controlled.
